# Supplementary material for: Bifidobacterium breve UCC2003 Exopolysaccharide Modulates the Early Life Microbiota by Acting as a Potential Dietary Substrate
Source: MDPI journal article supplement (doi:10.3390/nu12040948), 2020-03-29

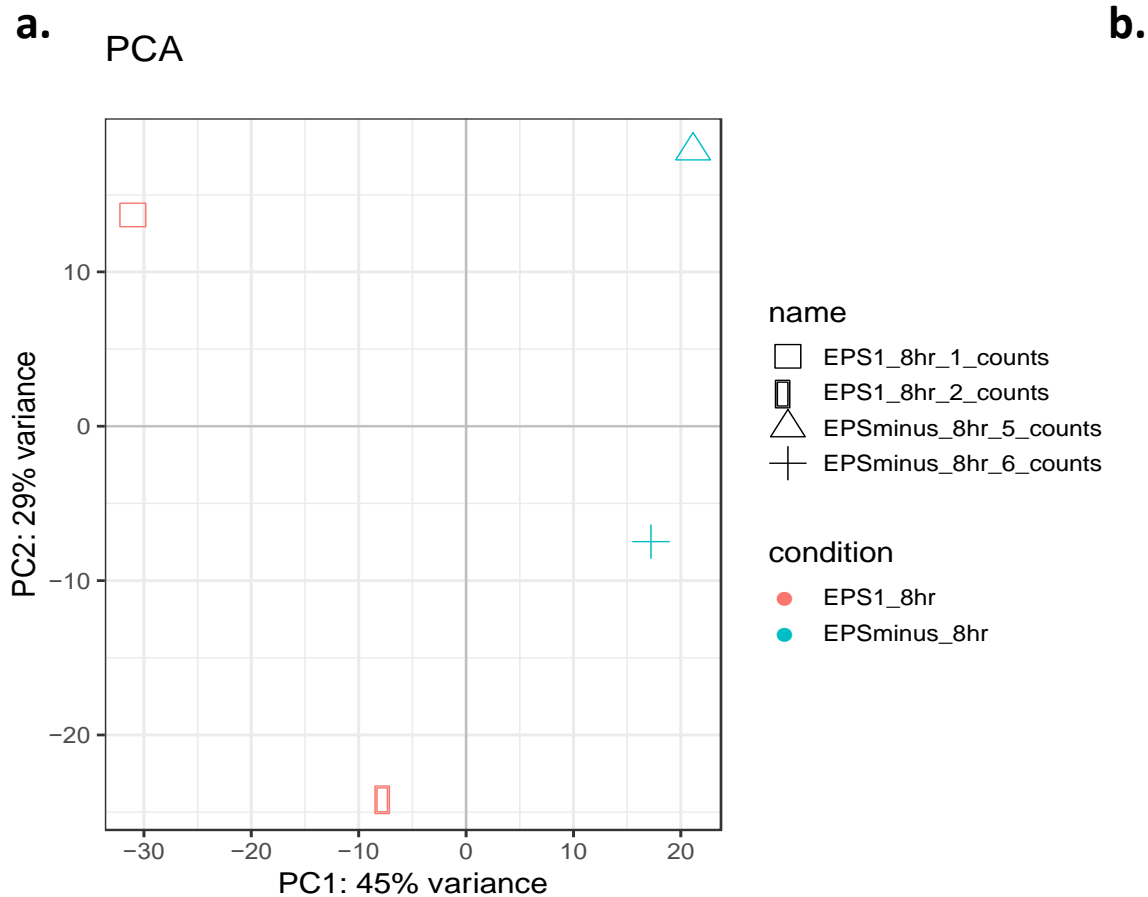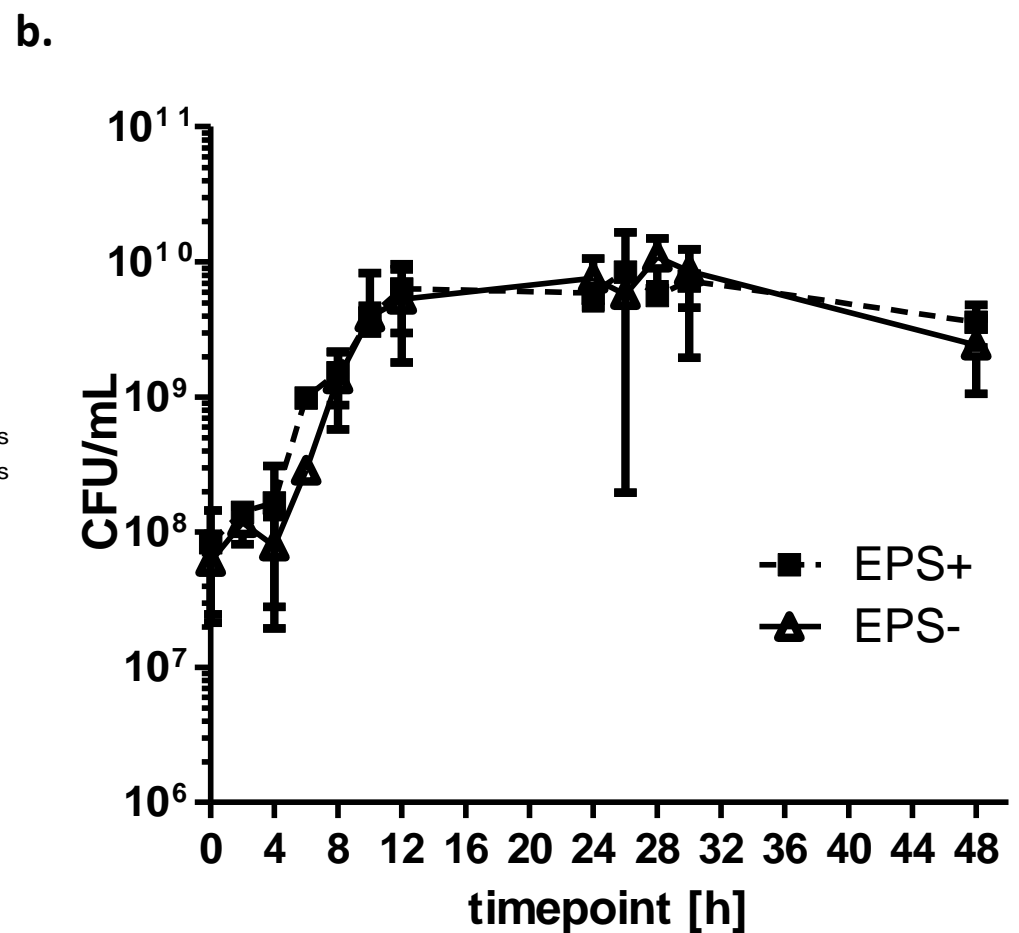

**Supplementary Figure 1: EPS-associated gene expression. (a)** Principle component analysis plot of RNASeq data from EPS+ and EPS- grown in rich media. Plots generated using normalised and regularised log transformed gene counts. **(b)** Growth kinetics of EPS+ and EPS- in MRS media plated in duplicate, error bars are  $\pm$  standard deviation from three independent experiments.

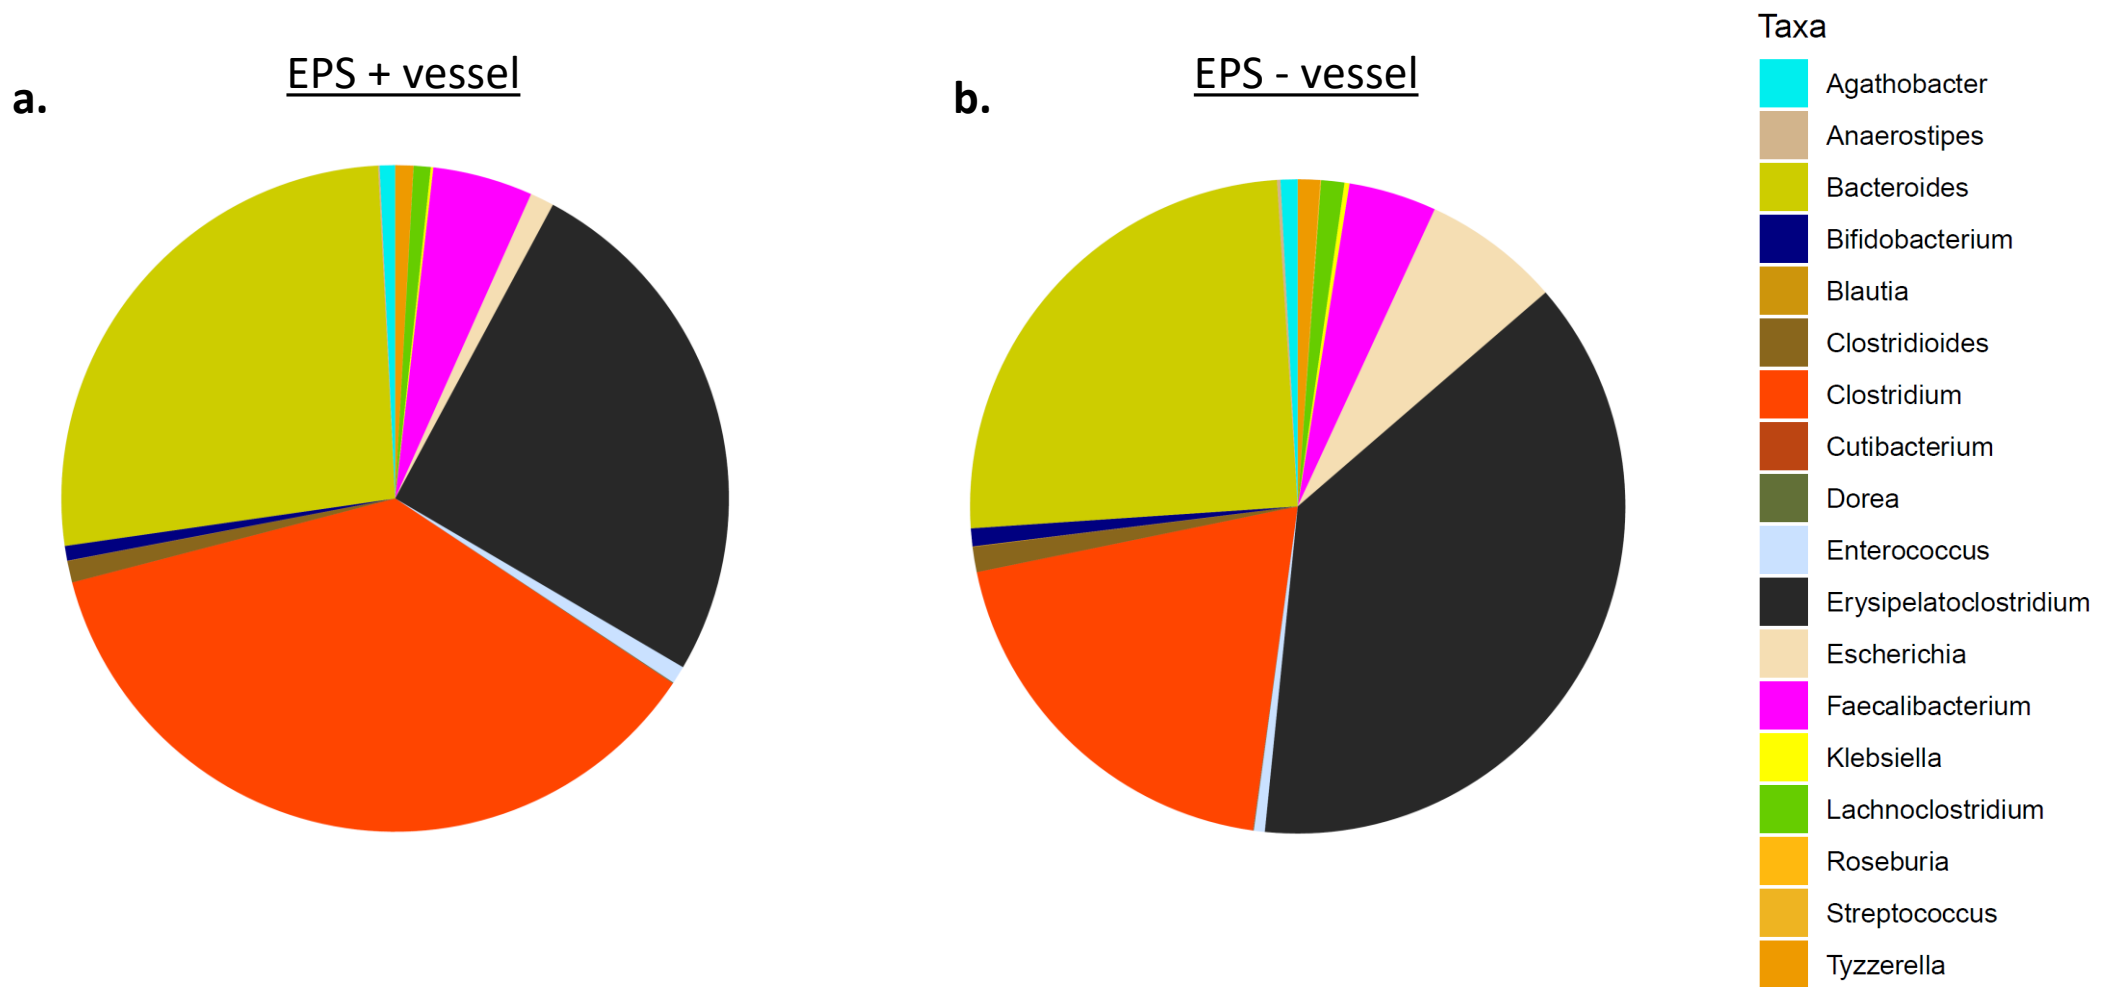

**Supplementary Figure 2:** Microbiota profiles for starting material used to inoculate **(a)** EPS+ and **(b)** EPS- vessels.

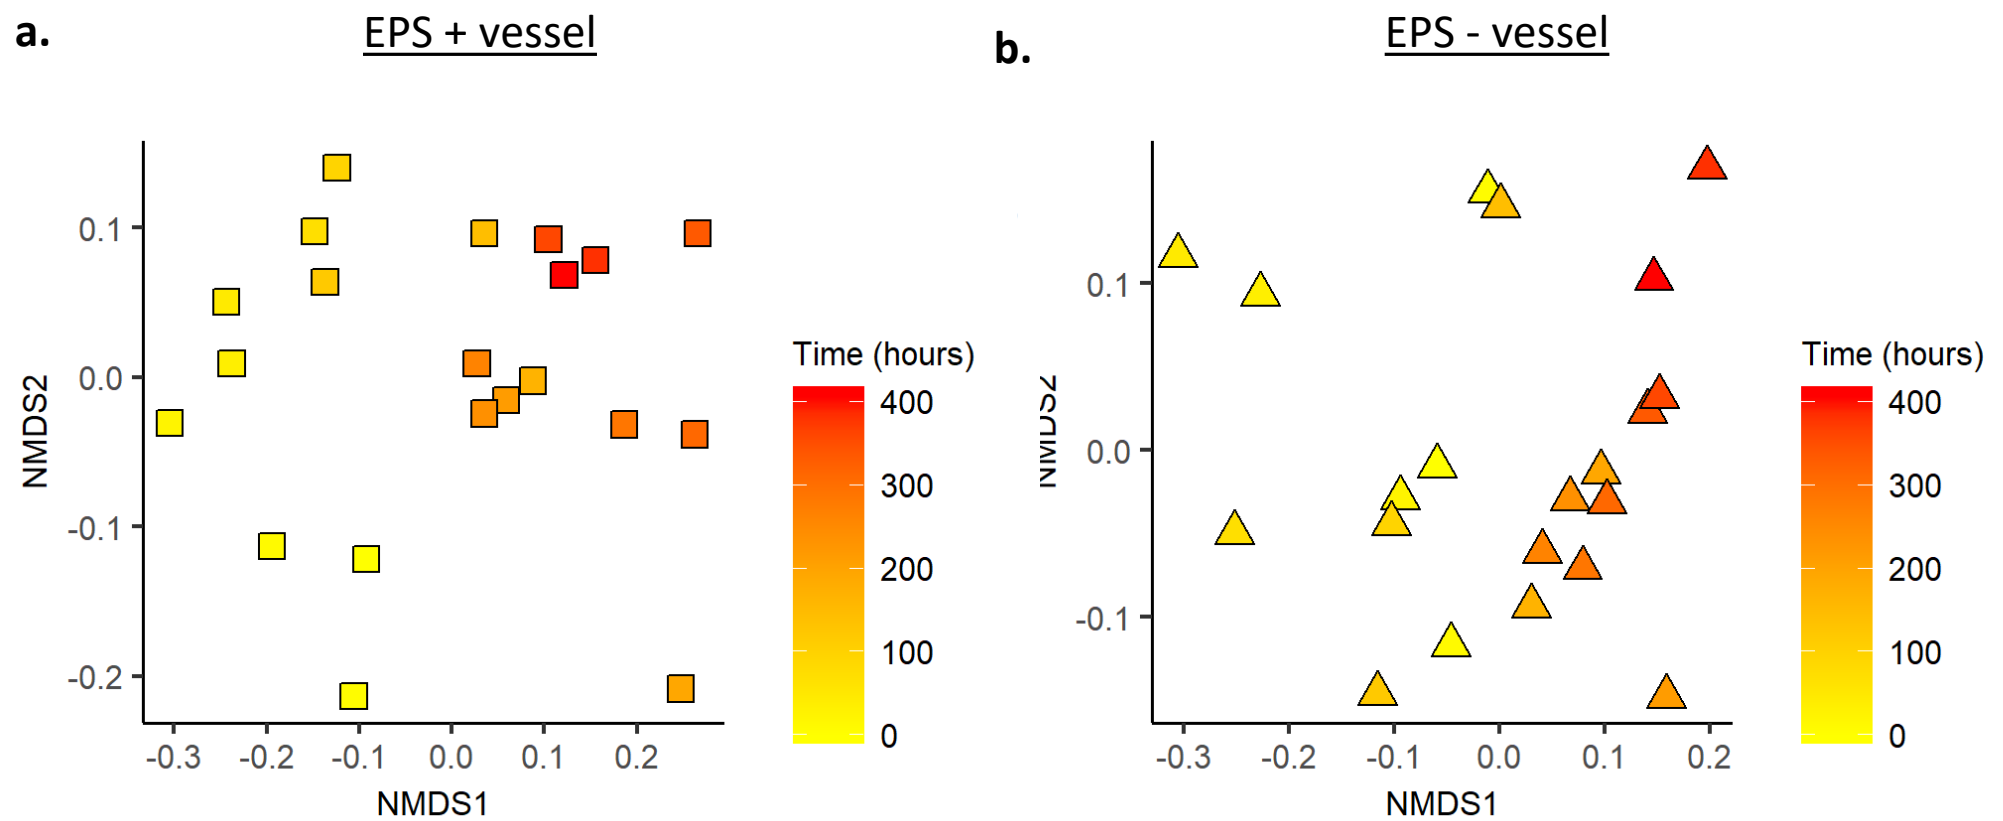

**Supplementary Figure 3:** Microbial changes over time as depicted using a NMDS plot using a Bray-Curtis dissimilarity calculation for **(a)** EPS+  $\square$  and **(b)** EPS-  $\triangle$  vessels. Colour change denotes change in time from t=0 (yellow) to t=408h (red).

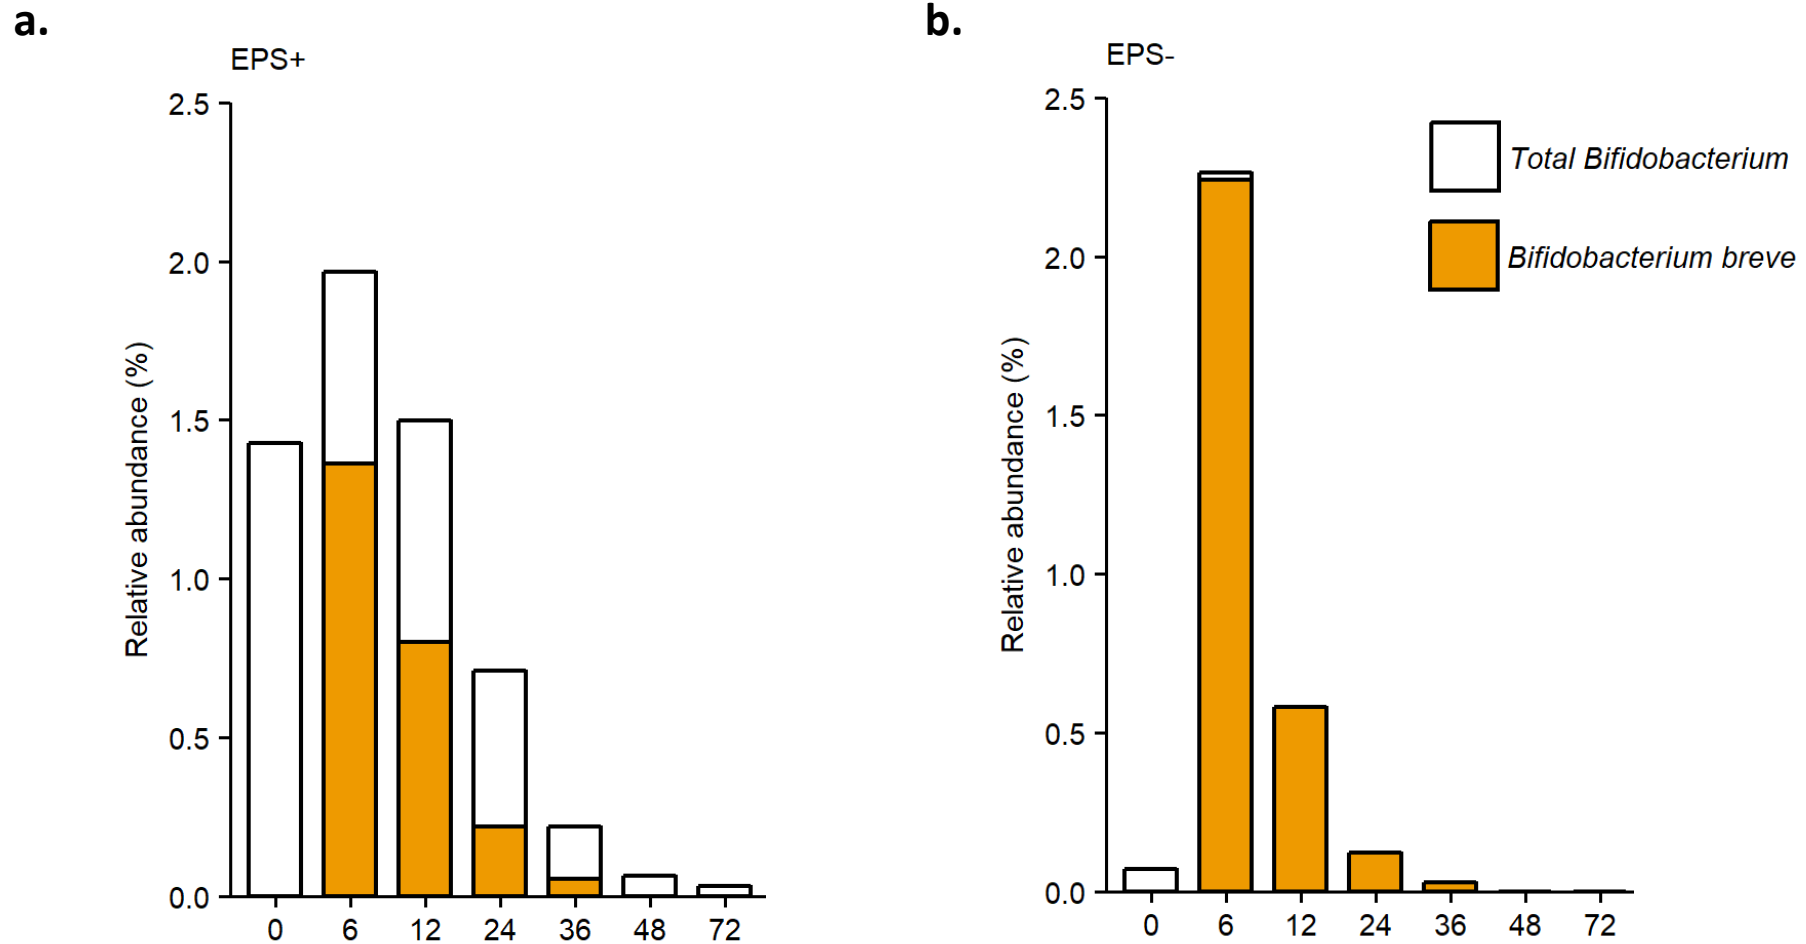

**Supplementary Figure 4:** 16S rRNA reads from each vessel **(a)** EPS + and **(b)** EPS – that correspond to the total abundance of *Bifidobacterium* reads in each vessels (white bars) and *B. breve* proportion (orange bars) over 72h. Note time point 0 correlates to the abundance of *Bifidobacterium* reads prior to inoculation with *B. breve* strains.

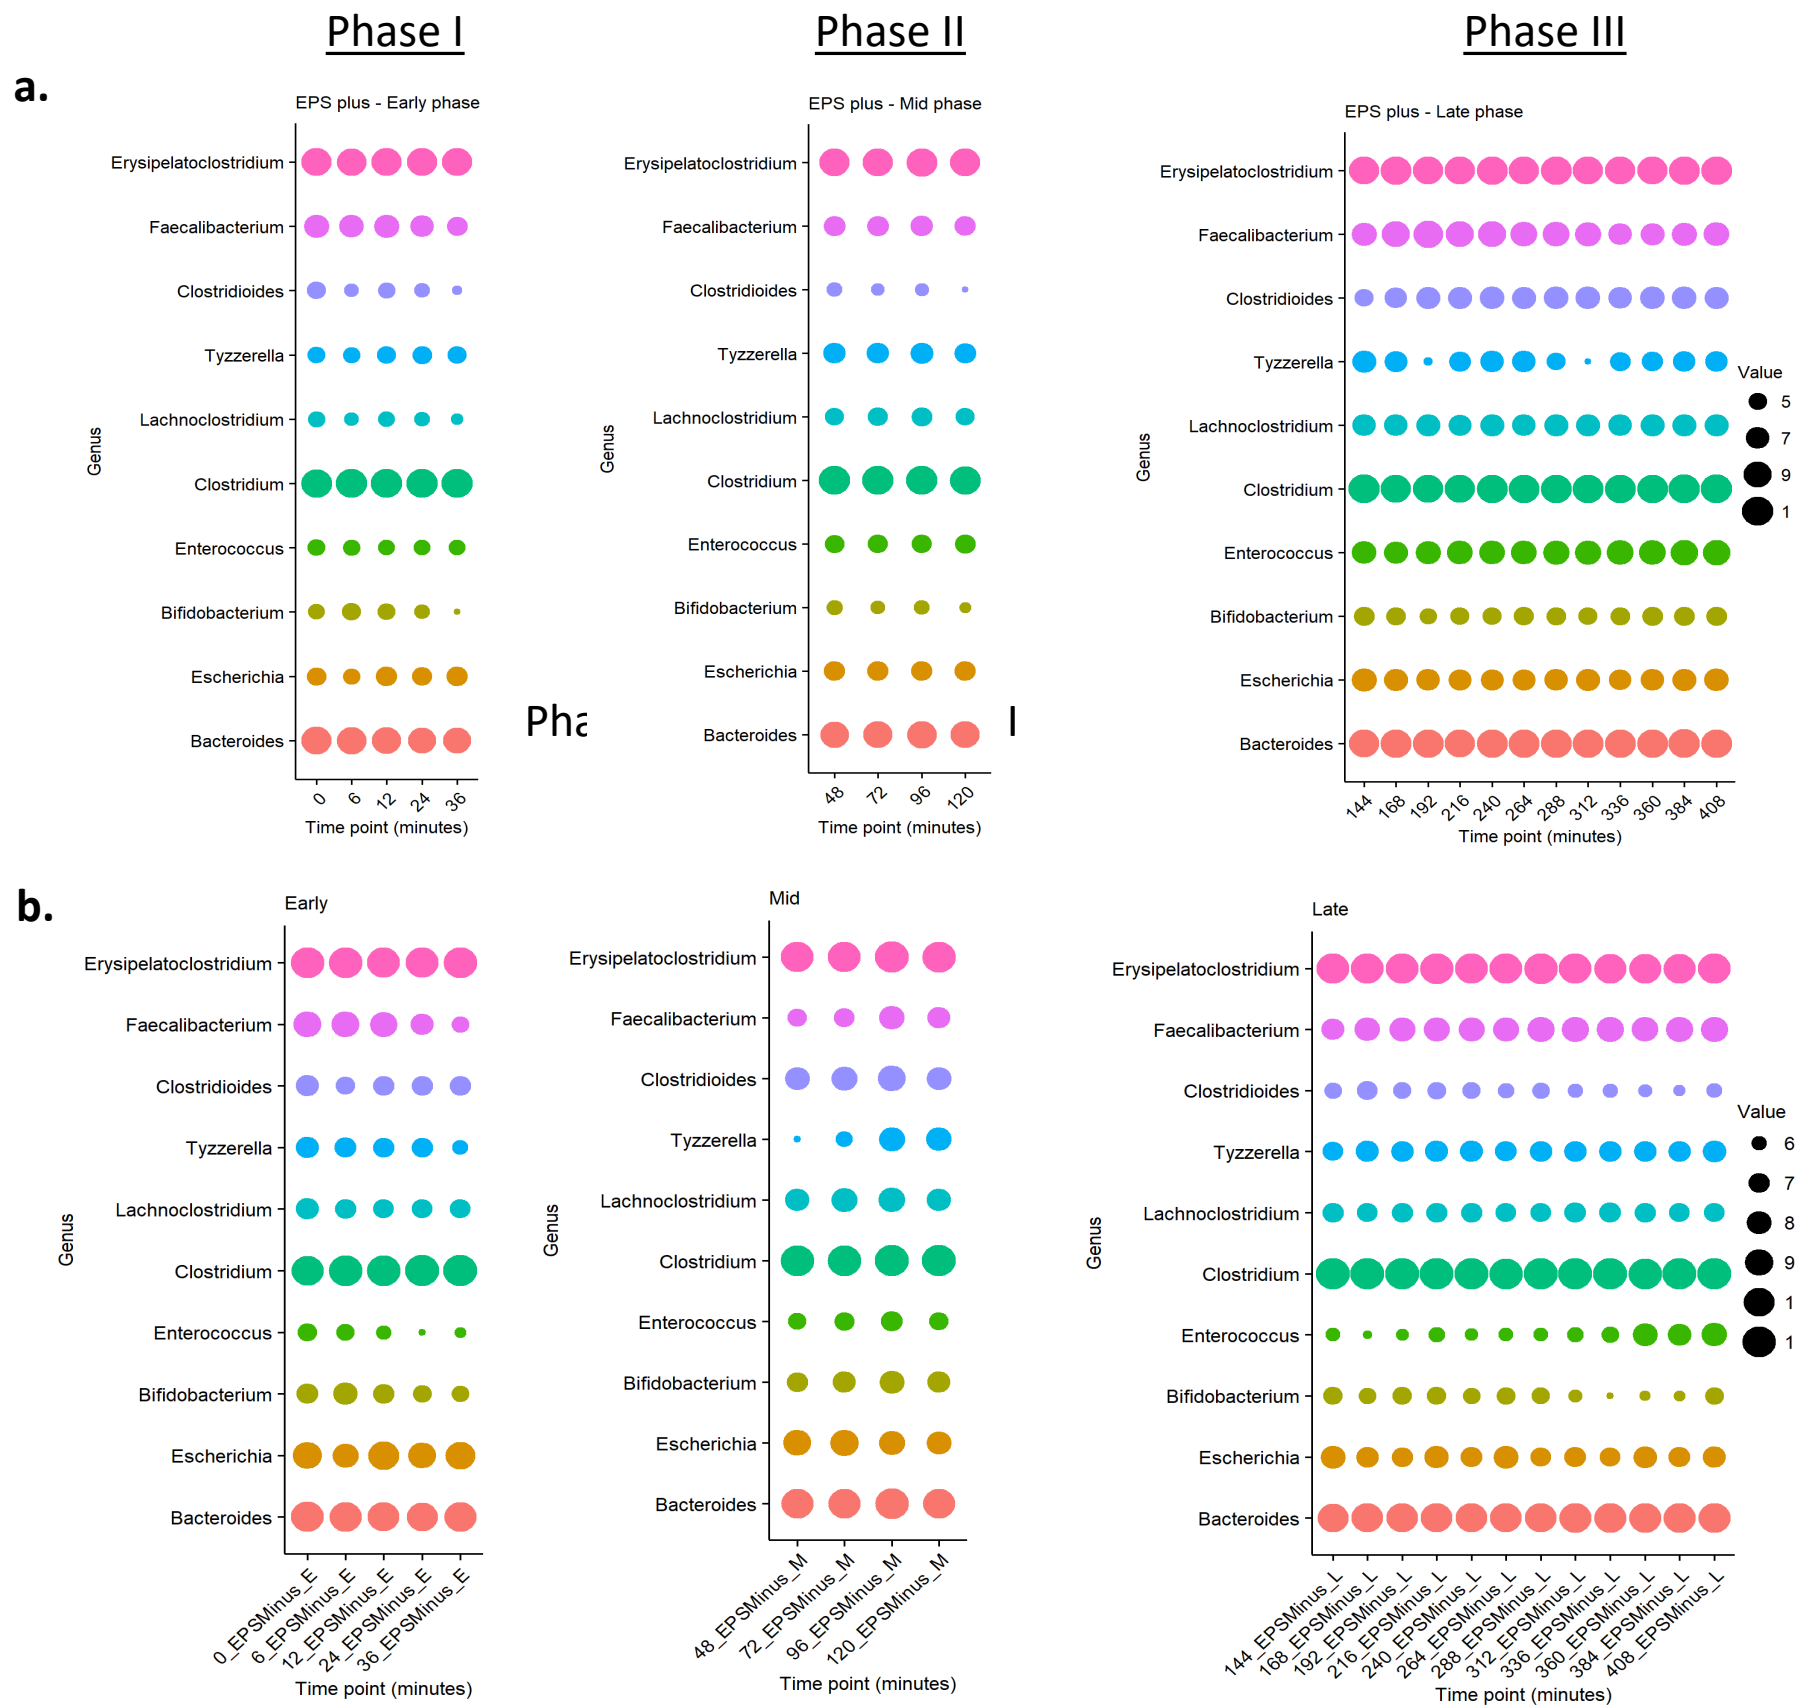

**Supplementary Figure 5: 16S rRNA genus bubble plot from the (a) EPS+ and (b) EPS- vessels in each phase. Read counts were transferred into reference values to identify small abundance taxa. Samples are clustered on genera abundance.**

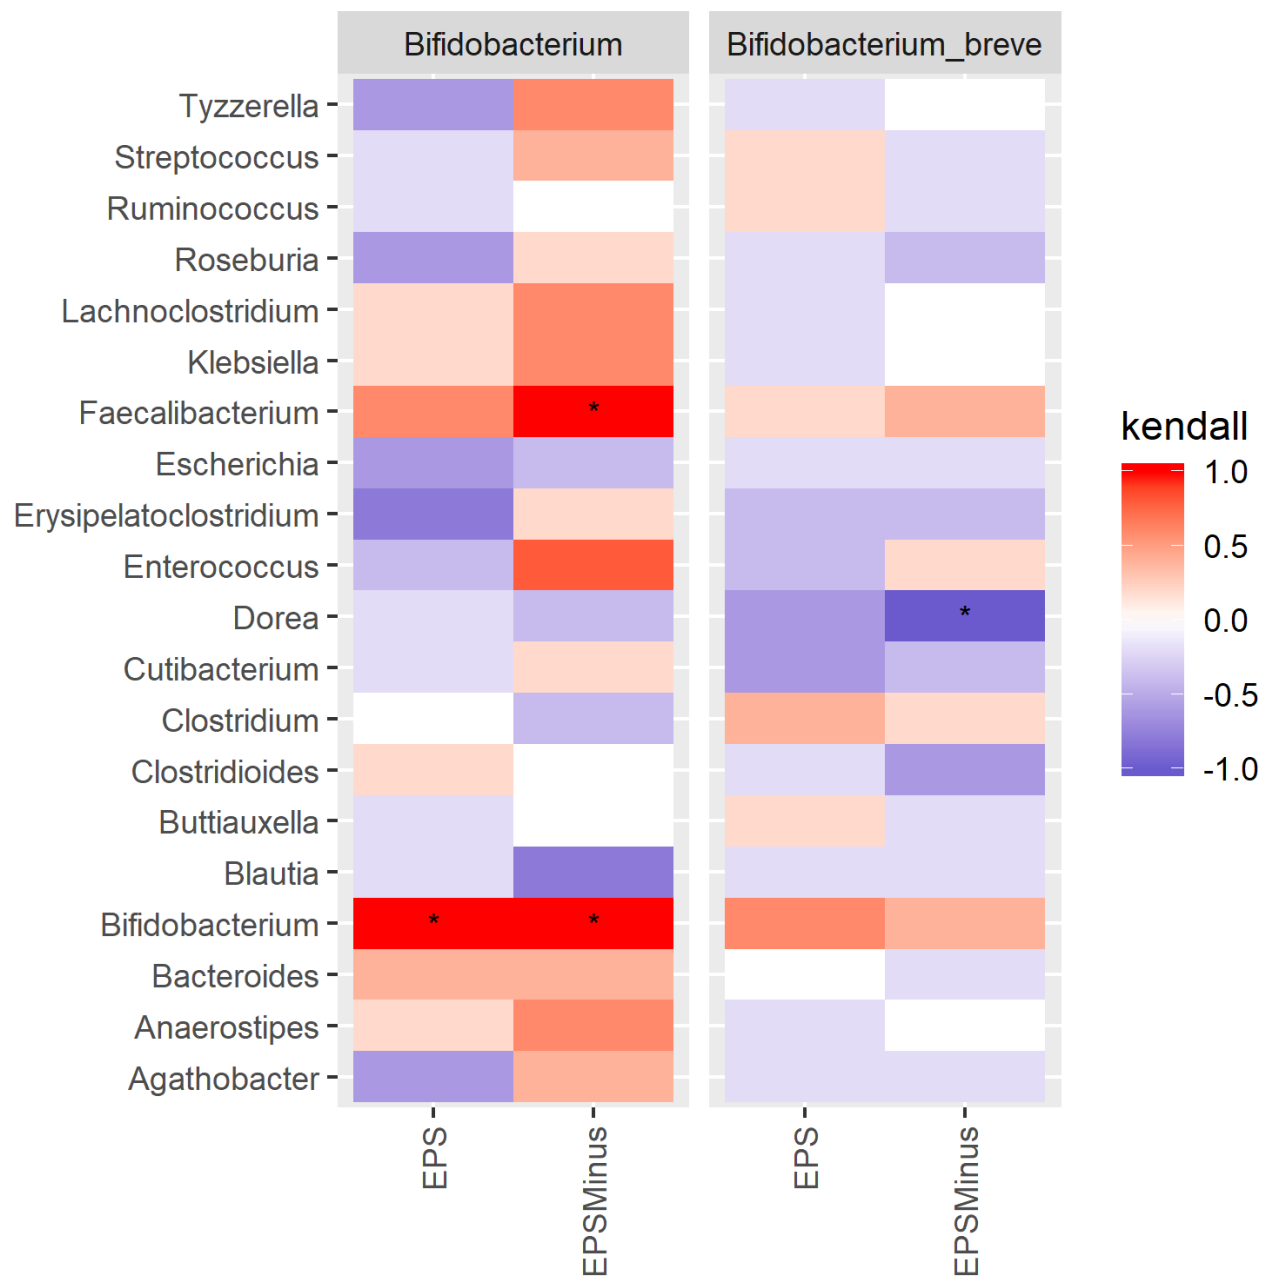

**Supplementary Figure 6:** Spearman correlation of either *Bifidobacterium* or *B. breve* with other genera in EPS+ and EPS- vessels (t=1-36h) using a Kendall rank correlation coefficient analysis in R Studio (\*p=0.033).

a.

EPS + vessel

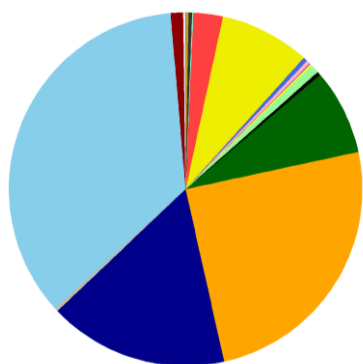

EPS - vessel

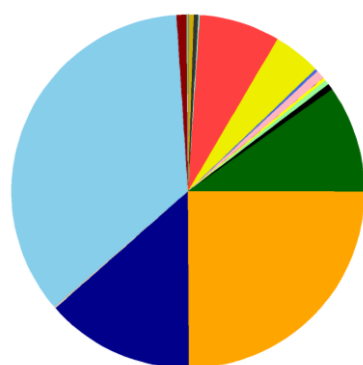

Metabolite

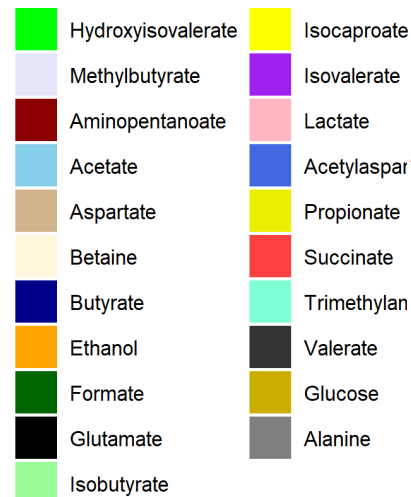

**Supplementary Figure 7: (a)**  $^1\text{H}$  NMR metabolic at t=0 for EPS+ and EPS- vessels. **(b)** Spearman correlation between top 10 bacteria genera against all identified metabolites by  $^1\text{H}$  NMR. **(c)** Spearman correlation between top 20 bacteria genera against all identified metabolites by  $^1\text{H}$  NMR. \* $p < 0.05$ ; \*\* $p < 0.01$ ; \*\*\* $p < 0.001$ ; + indicates metabolite concentrations below detectable limits.

b.

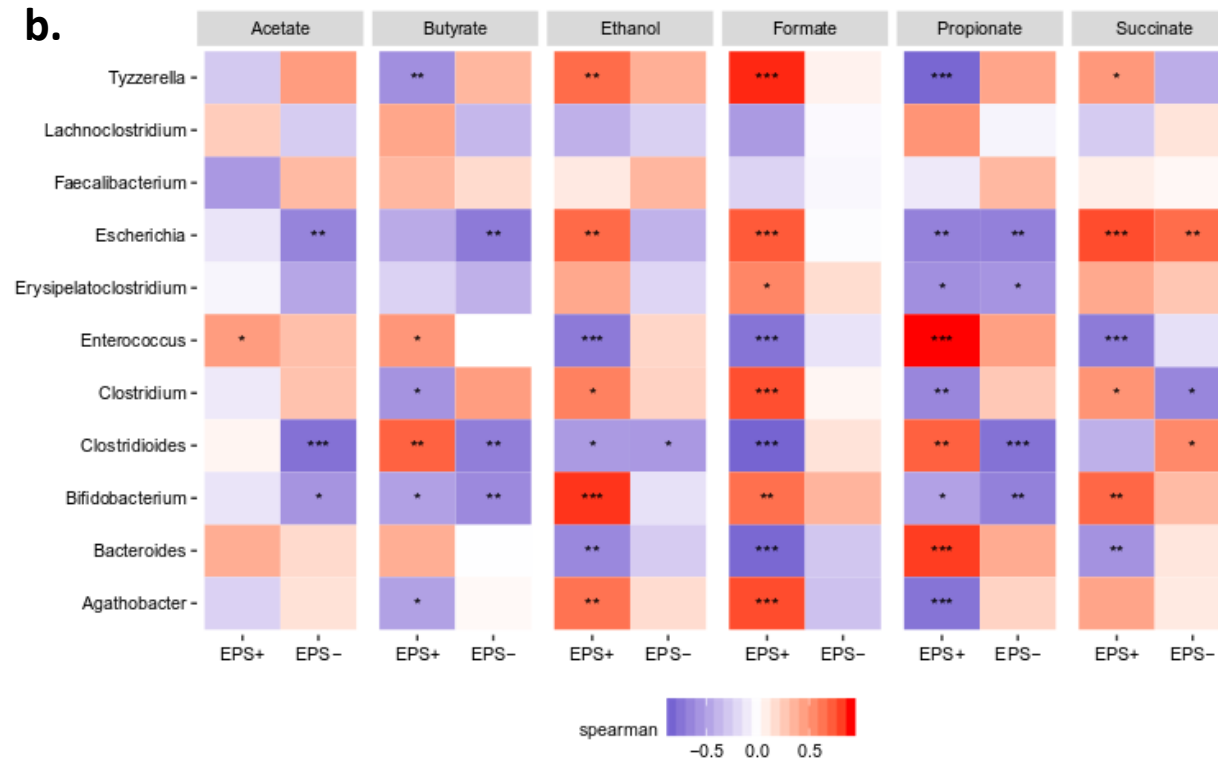

c.

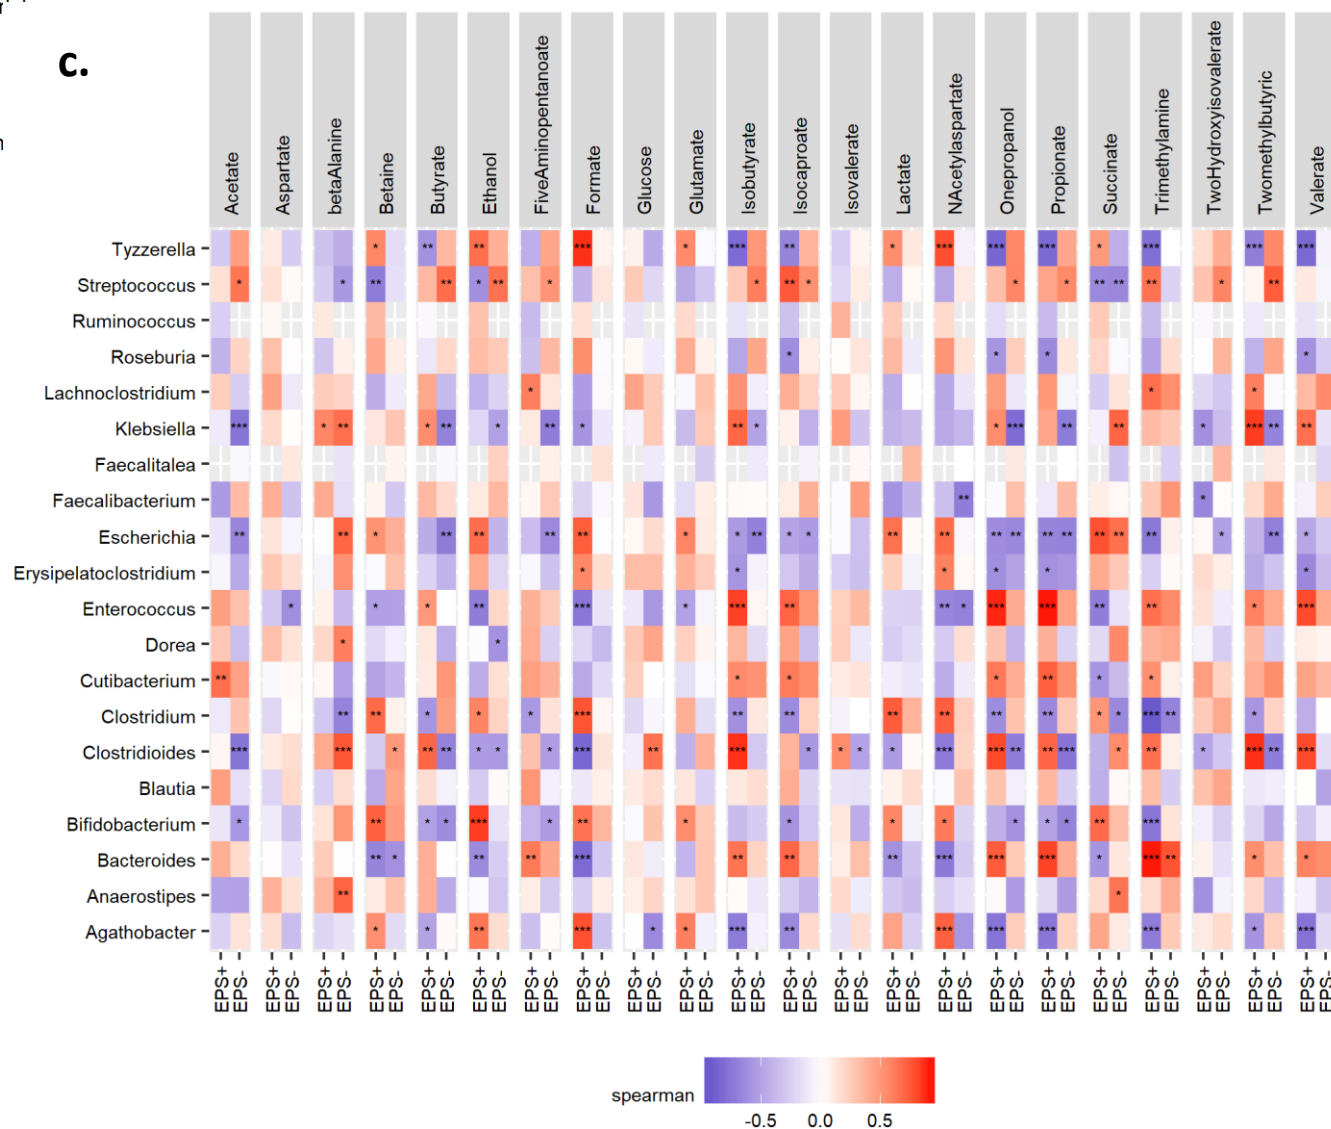

Supplement: s1 [file s1]
